# Supplementary material for: Hydrogeochemical modelling and the probabilistic health risk assessment of nitrate and fluoride in the groundwater of Kota stone mine regions
Source: Royal Society of Chemistry journal article supplement (doi:10.1039/d5ew00905g), 2026-01-01
Supplement: d5ew00905g1.pdf [file d5ew00905g1.pdf]

## Supplementary file

### Hydrogeochemical Modelling and Probabilistic Health Risk Assessment of Nitrate and Fluoride in Groundwater of Kota Stone Mines

#### List of Tables

Table S1: Sampling Locations with Coordinates

Table S2: Classification of groundwater quality based on EWQI

Table S3: Parameter values for non-carcinogenic health risk assessment models

Table S4: Categorisation of groundwater samples based on total hardness

Table S5: Deterministic health risks of children and adults in pre- and post-monsoon

Table S1: Sampling Locations with Coordinates

| Sample Number | Site                         | Lat       | Long      |
|---------------|------------------------------|-----------|-----------|
| Sample 1      | Sathal Khedi                 | 24°39'10" | 75°59'58" |
| Sample 2      | Khandaila                    | 24°39'10" | 75°58'38" |
| Sample 3      | Gram Pachayat                | 24°39'6"  | 75°58'17" |
| Sample 4      | Gram Pachayat 2              | 24°39'7"  | 75°58'19" |
| Sample 5      | Redas colony                 | 24°39'5"  | 75°57'54" |
| Sample 6      | Redas colony 2               | 24°39'1"  | 75°57'36" |
| Sample 7      | Yadav Mohalla                | 24°38'57" | 75°56'47" |
| Sample 8      | Mansapur                     | 24°38'20" | 75°56'53" |
| Sample 9      | Nalodiya village             | 24°37'1"  | 75°58'6"  |
| Sample 10     | Before railway crossing      | 24°36'48" | 75°58'19" |
| Sample 11     | Near pond                    | 24°36'46" | 75°58'19" |
| Sample 12     | Guradiya Jhala               | 24°32'56" | 75°59'33" |
| Sample 13     | Amritkhedi                   | 24°35'58" | 76°0'29"  |
| Sample 14     | Kumbhkot                     | 24°37'4"  | 76°0'9"   |
| Sample 15     | KMC stone, Nayagaon          | 24°39'30" | 76°0'45"  |
| Sample 16     | Sathalkhedi School           | 24°39'11" | 76°0'22"  |
| Sample 17     | Sathelkhedi Sec School       | 24°39'2"  | 76°0'14"  |
| Sample 18     | Sathalkedi farm              | 34°39'35" | 76°0'46"  |
| Sample 19     | Peepakhedi                   | 24°39'35" | 76°0'4"   |
| Sample 20     | Peepakhedi 2                 | 24°39'47" | 76°0'18"  |
| Sample 21     | Gram pachayat<br>Sathalkhedi | 24°39'21" | 76°0'2"   |
| Sample 22     | Laxmipura School             | 24°38'47" | 76°0'19"  |
| Sample 23     | Laxmipura colony             | 24°37'55" | 76°0'17"  |
| Sample 24     | Durjanpura                   | 24°38'35" | 76°0'21"  |
| Sample 25     | Kumbhkot                     | 24°36'51" | 75°59'60" |
| Sample 26     | Lakhariya 1                  | 24°35'38" | 76°0'38"  |

|           |                             |           |           |
|-----------|-----------------------------|-----------|-----------|
| Sample 27 | Lakahriya 2                 | 24°35'30" | 76°0'39"  |
| Sample 28 | Suket Road                  | 24°35'42" | 76°0'58"  |
| Sample 29 | Teen tapri Village          | 24°36'56" | 76°1'58"  |
| Sample 30 | Sureda                      | 24°37'37" | 76°2'17"  |
| Sample 31 | Dingy village               | 24°39'4"  | 76°2'36"  |
| Sample 32 | Dingy village 2             | 24°40'14" | 76°1'55"  |
| Sample 33 | Antraliya                   | 24°41'36" | 76°0'58"  |
| Sample 34 | Udpura                      | 24°43'39" | 75°59'2"  |
| Sample 35 | Modak boys school           | 24°43'47" | 75°58'56" |
| Sample 36 | Modal Police station        | 24°43'46" | 75°58'28" |
| Sample 37 | SBI, Modak                  | 24°43'19" | 75°57'3"  |
| Sample 38 | Dudakhedi                   | 24°42'6"  | 75°56'16" |
| Sample 39 | Navoday school              | 24°40'16" | 75°55'53" |
| Sample 40 | Manpura road                | 24°45'29" | 76°0'11"  |
| Sample 41 | Manpura village             | 24°45'35" | 76°1'2"   |
| Sample 42 | Gram Panchayat<br>Khairabad | 24°44'50" | 76°1'13"  |
| Sample 43 | Sarvada                     | 24°45'52" | 75°59'28" |
| Sample 44 | School Sarvada              | 24°44'44" | 75°59'47" |
| Sample 45 | Gujariyakhdi 1              | 24°44'23" | 76°0'14"  |
| Sample 46 | Gujariyakhedi 2             | 24°44'23" | 76°0'28"  |
| Sample 47 | Jalimpura farm              | 24°45'31" | 75°59'19" |
| Sample 48 | Nimana 1                    | 24°41'36" | 75°58'46" |
| Sample 49 | Nimana 2                    | 24°40'23" | 75°58'34" |
| Sample 50 | Hariyakhedi                 | 24°39'8"  | 75°55'8"  |
| Sample 51 | Khairabad                   | 24°42'34" | 75°59'51" |

Table S2: Classification of groundwater quality based on EWQI

| EWQI range | Classification |
|------------|----------------|
| <25        | Excellent      |
| 25-50      | Good           |
| 50-100     | Medium         |
| 100-150    | Poor           |
| >150       | Very poor      |

Table S3: Parameter values for non-carcinogenic health risk assessment models

| Parameters | Unit                    | Children | Adult  |
|------------|-------------------------|----------|--------|
| IR         | L day <sup>-1</sup>     | 1        | 3.53   |
| EF         | days year <sup>-1</sup> | 365      | 365    |
| ED         | years                   | 6        | 70     |
| BW         | kg                      | 15       | 70     |
| AT         | days                    | 365*6    | 365*70 |

Table S4: Categorisation of groundwater samples based on total hardness

| S. No               | Groundwater class based on TH | Range   | No. of samples (%) | Sample number                                                                 |
|---------------------|-------------------------------|---------|--------------------|-------------------------------------------------------------------------------|
| <b>Pre-monsoon</b>  |                               |         |                    |                                                                               |
| 1                   | Soft                          | <75     | 7.84               | 10,27,35,38                                                                   |
| 2                   | Moderately hard               | 75-150  | 47.06              | 2,3,4,7,14,17,18,19,21,23,26,30,32,34,36,37,40,41,42,45,47,48,50,51           |
| 3                   | Hard                          | 150-300 | 37.25              | 1,5,6,8,9,11,12,13,15,16,20,22,25,31,33,39,43,44,49                           |
| 4                   | Very hard                     | >300    | 7.84               | 24,28,29,46                                                                   |
| <b>Post-monsoon</b> |                               |         |                    |                                                                               |
| 1                   | Soft                          | <75     | 21.57              | 21,28,29,30,32,33,34,36,39,41,46                                              |
| 2                   | Moderately hard               | 75-150  | 54.90              | 1,2,3,4,5,6,11,14,15,16,17,18,19,20,23,24,25,35,37,38,40,42,44,47,48,49,50,51 |
| 3                   | Hard                          | 150-300 | 13.73              | 7,8,9,12,13,31,43                                                             |
| 4                   | Very hard                     | >300    | 9.80               | 10,22,26,27,45                                                                |

Table S5: Deterministic health risks of children and adults in pre- and post-monsoon

| HQ ingestion | Fluoride    |       |              |       | Nitrate     |       |              |       |
|--------------|-------------|-------|--------------|-------|-------------|-------|--------------|-------|
|              | Pre-monsoon |       | Post-monsoon |       | Pre-monsoon |       | Post-monsoon |       |
|              | Children    | Adult | Children     | Adult | Children    | Adult | Children     | Adult |
| Min          | 0.37        | 0.28  | 0.33         | 0.25  | 0.01        | 0.01  | 3.74         | 0.09  |
| Max          | 10.06       | 7.61  | 9.52         | 7.20  | 3.32        | 2.51  | 0.12         | 2.83  |
| Average      | 3.03        | 2.29  | 2.89         | 2.19  | 1.37        | 1.04  | 1.52         | 1.15  |
| SD           | 1.49        | 1.13  | 1.44         | 1.09  | 0.91        | 0.69  | 1.06         | 0.80  |

**List of Figures:**

*Fig. S1: Spatial map of the groundwater sampling from the Kota Stone Mine out areas, Ramganj Mandi, Kota (N = 51)*

*Fig. S2: Piper diagram of collected groundwater samples of (A) pre-monsoon and (B) post-monsoon season in Kota mine spoil areas*

*Fig. S3: Gibbs diagram of the groundwater samples in the pre-monsoon season*

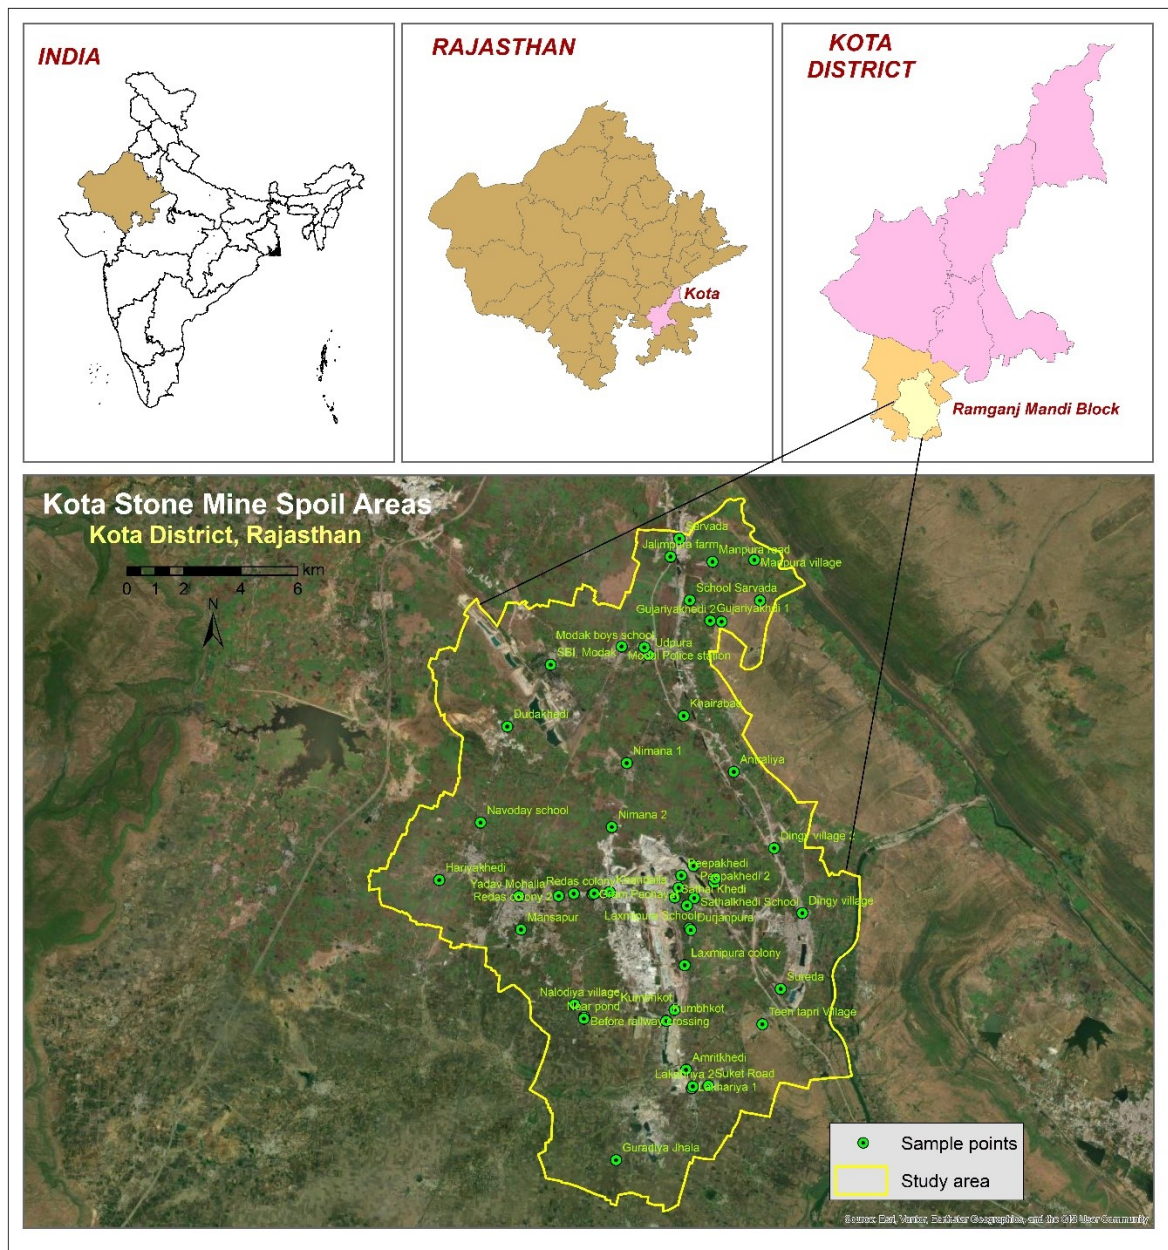

Fig. S1: Spatial map of the groundwater sampling from the Kota Stone Mine out areas, Ramganj Mandi, Kota (N = 51)

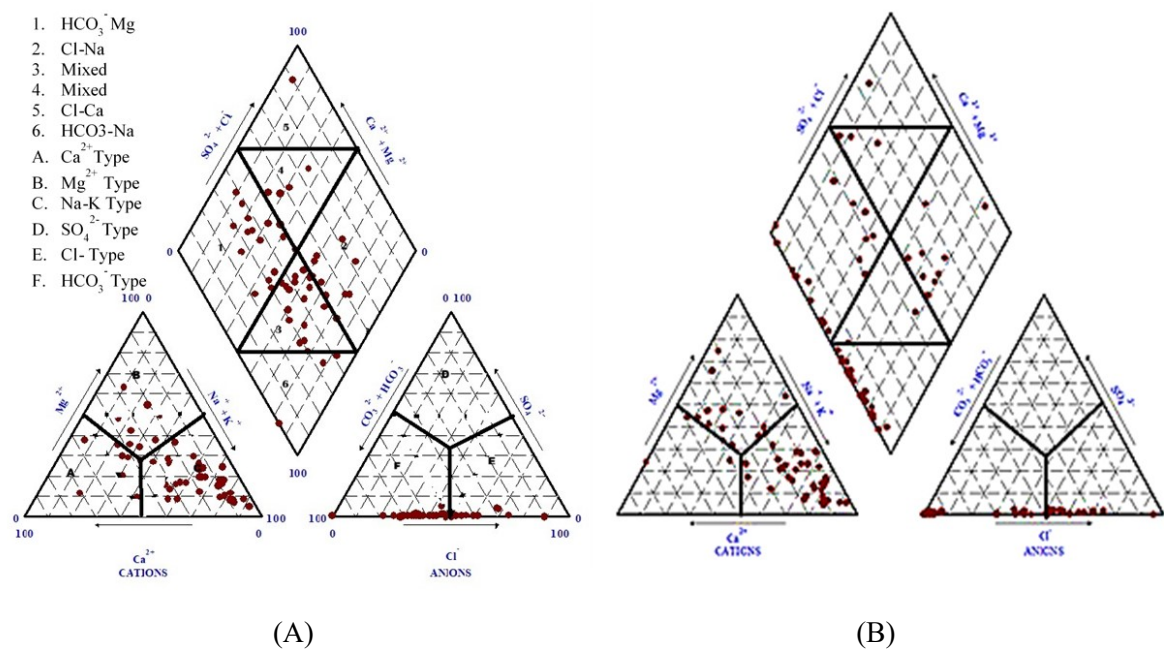

Fig. S2 Piper diagram of collected groundwater samples of (A) pre-monsoon and (B) post-monsoon season in Kota mine spoil areas

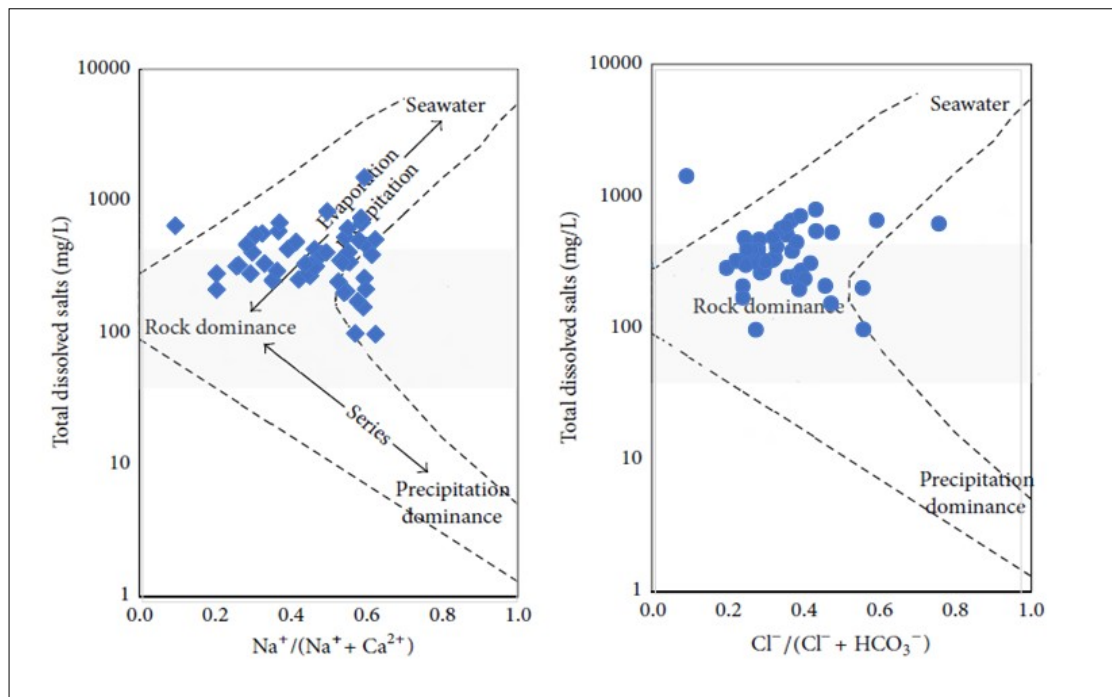

Fig. S3: Gibbs diagram of the groundwater samples in the pre-monsoon season
